# Supplementary material
Source: PubMed Central journal article supplement (PMC3353769)

## Interaction of Nucleic Acids with the Glycocalyx

Michael J. Palte and Ronald T. Raines\*

| <b>Contents</b>                                                                                        | <b>Page</b> |
|--------------------------------------------------------------------------------------------------------|-------------|
| Table of Contents                                                                                      | S1          |
| <b>Figure S1.</b> Cells incorporate a LO but not a lipid-free oligonucleotide in their plasma membrane | S2          |
| <b>Figure S2.</b> Cellular incorporation of a LO depends on time                                       | S2          |
| <b>Figure S3.</b> Cellular incorporation of a LO is affected by the medium                             | S3          |
| <b>Figure S4.</b> Cellular incorporation of LOs is affected by hydrophobicity                          | S3          |
| <b>Figure S5.</b> Cells release a long LO after incorporation                                          | S3          |
| NMR spectra                                                                                            | S4–S6       |

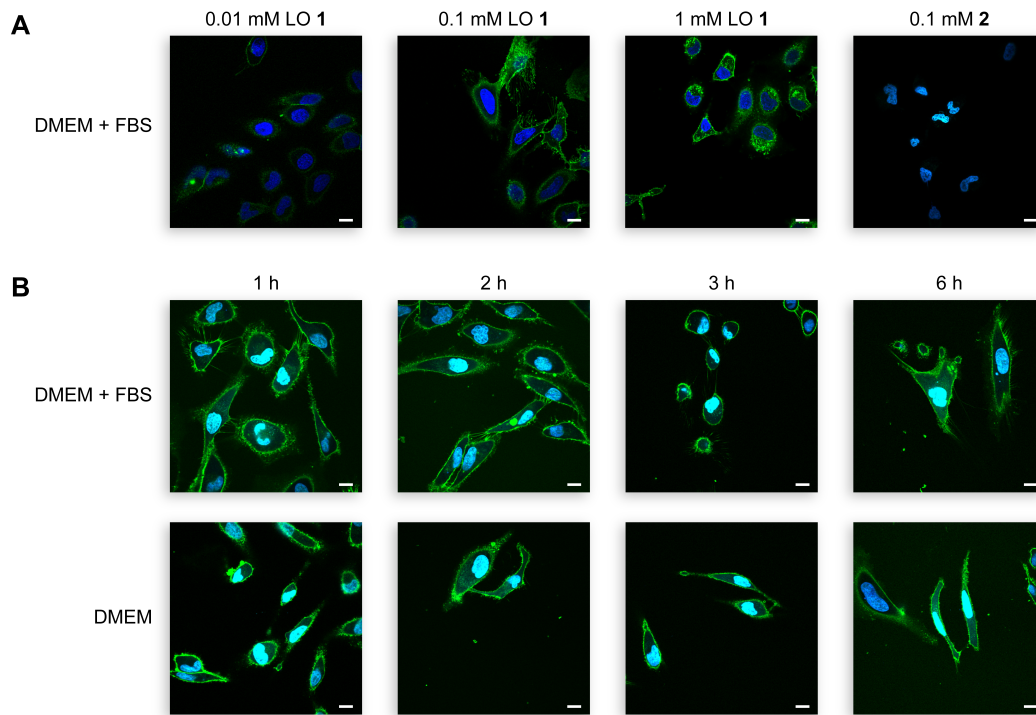

**Figure S1.** Cells incorporate a LO but not a lipid-free oligonucleotide in their plasma membrane. Images were obtained by confocal microscopy. LO 1 and oligonucleotide 2 are green (fluorescein); cell nuclei are blue (Hoechst 33342). (A) LO 1 was suspended in DMEM containing 10% v/v FBS and incubated with HeLa cells at the indicated concentration for 12 h. Oligonucleotide 2 was likewise incubated with HeLa cells for 4 h. (B) LO 1 (0.1 mM) was incubated with or without 10% v/v FBS for the indicated times. Scale bars: 10  $\mu$ m.

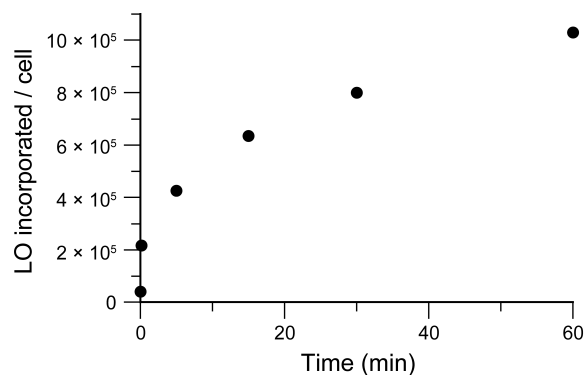

**Figure S2.** Cellular incorporation of a LO depends on time. LO 3 (10 mM) was incubated with HeLa cells for the indicated times, and incorporation was measured by flow cytometry.

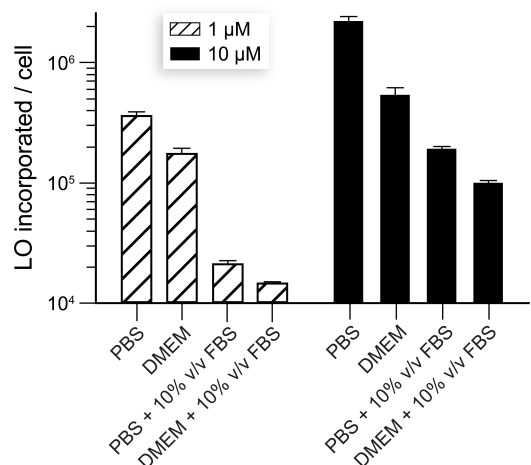

**Figure S3.** Cellular incorporation of a LO is affected by the medium. LO 3 (1 or 10  $\mu$ M) was incubated with HeLa cells for 15 min in the indicated media, and incorporation was measured by flow cytometry.  $n = 3$ ; error bars:  $\pm$ SD.

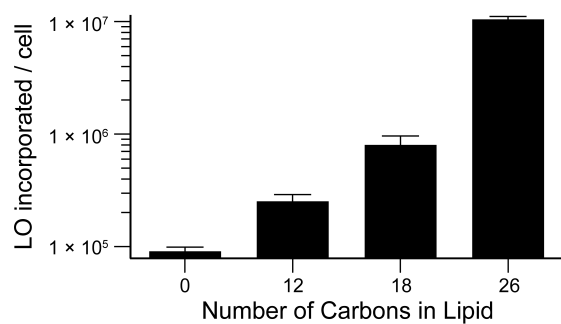

**Figure S4.** Cellular incorporation of LOs is affected by hydrophobicity. LO 9 (no lipid), LO 10 (C<sub>12</sub>), LO 3 (C<sub>18</sub>), and LO 11 (C<sub>26</sub>) at 10  $\mu$ M were incubated with HeLa cells for 15 min, and incorporation was measured by flow cytometry. Error bars:  $\pm$ SD.

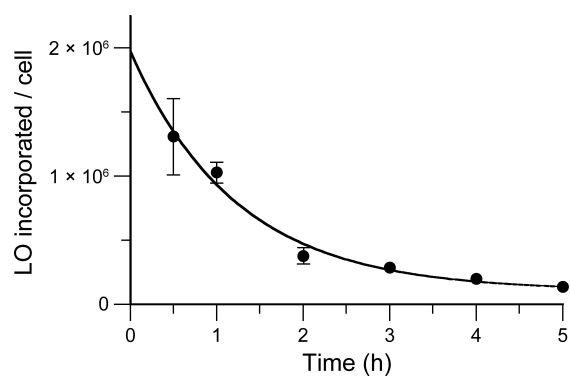

**Figure S5.** Cells release a long LO after incorporation. Fluorescent LO 11 (10  $\mu$ M), which has a C<sub>26</sub> lipid tail, was incorporated into the plasma membrane of HeLa cells, and retention was measured by flow cytometry. Error bars:  $\pm$ SD.

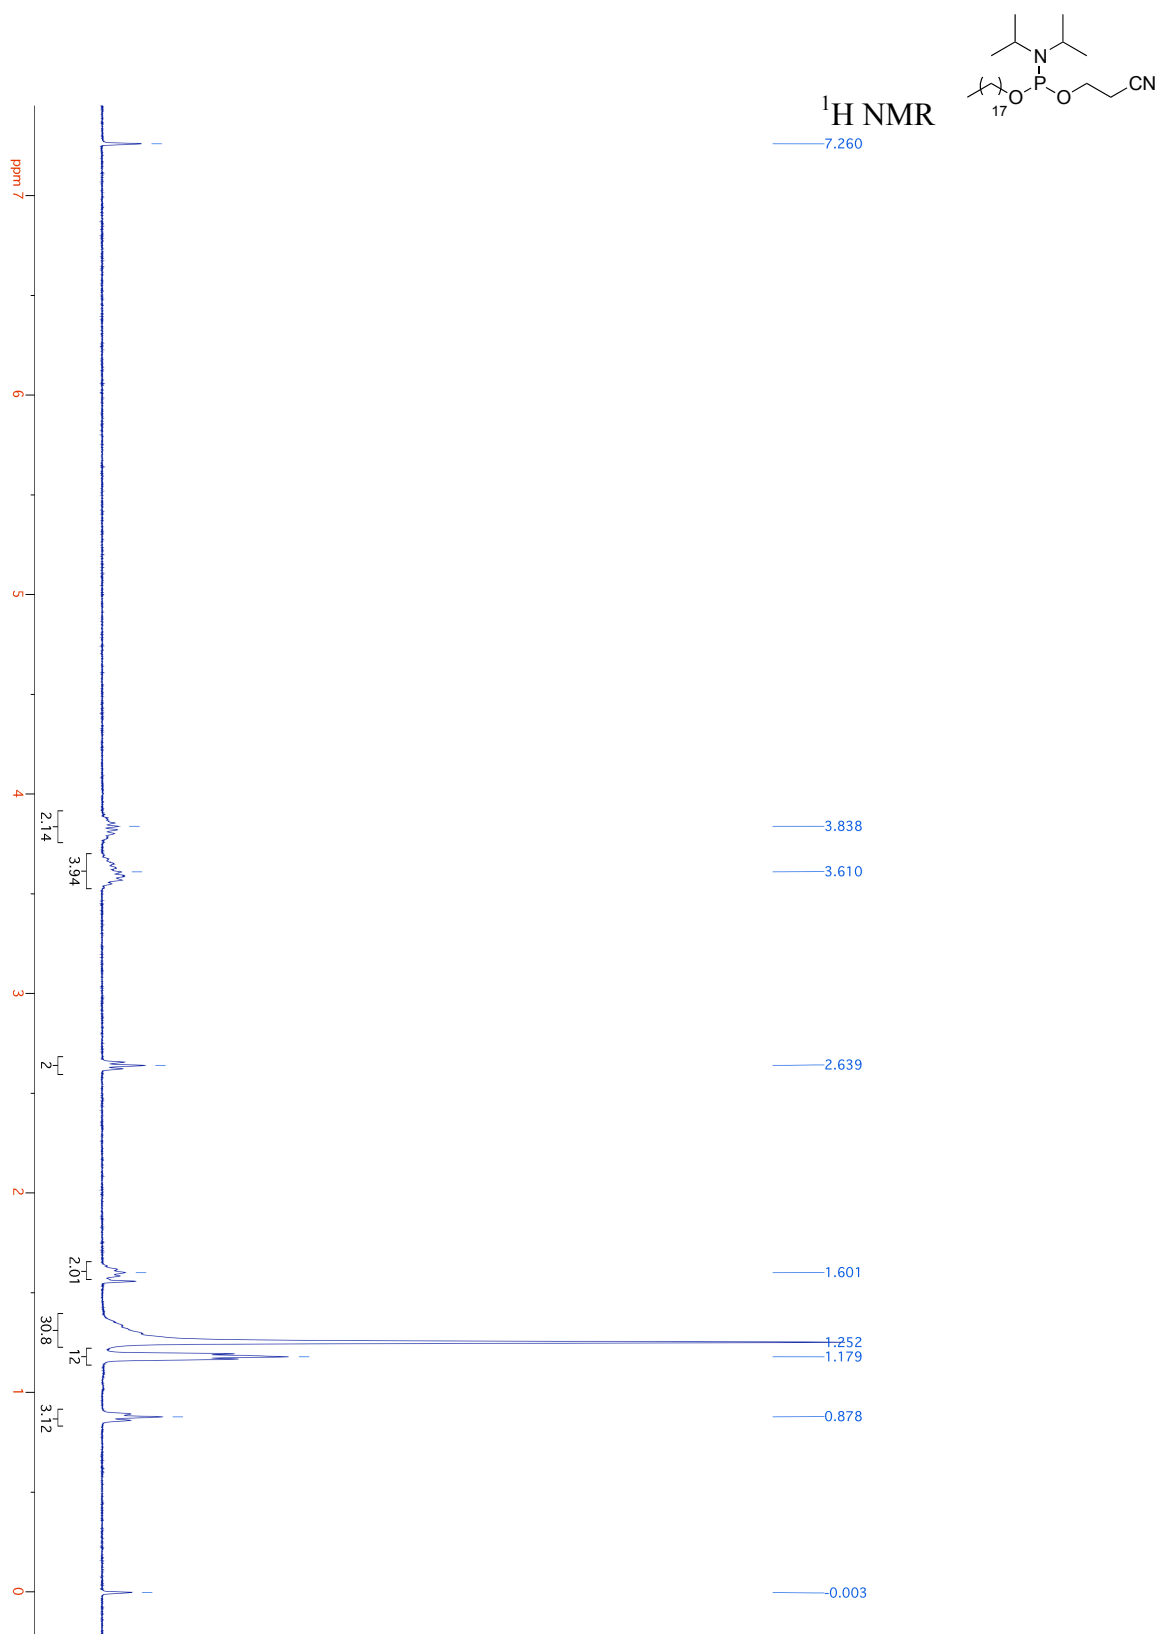

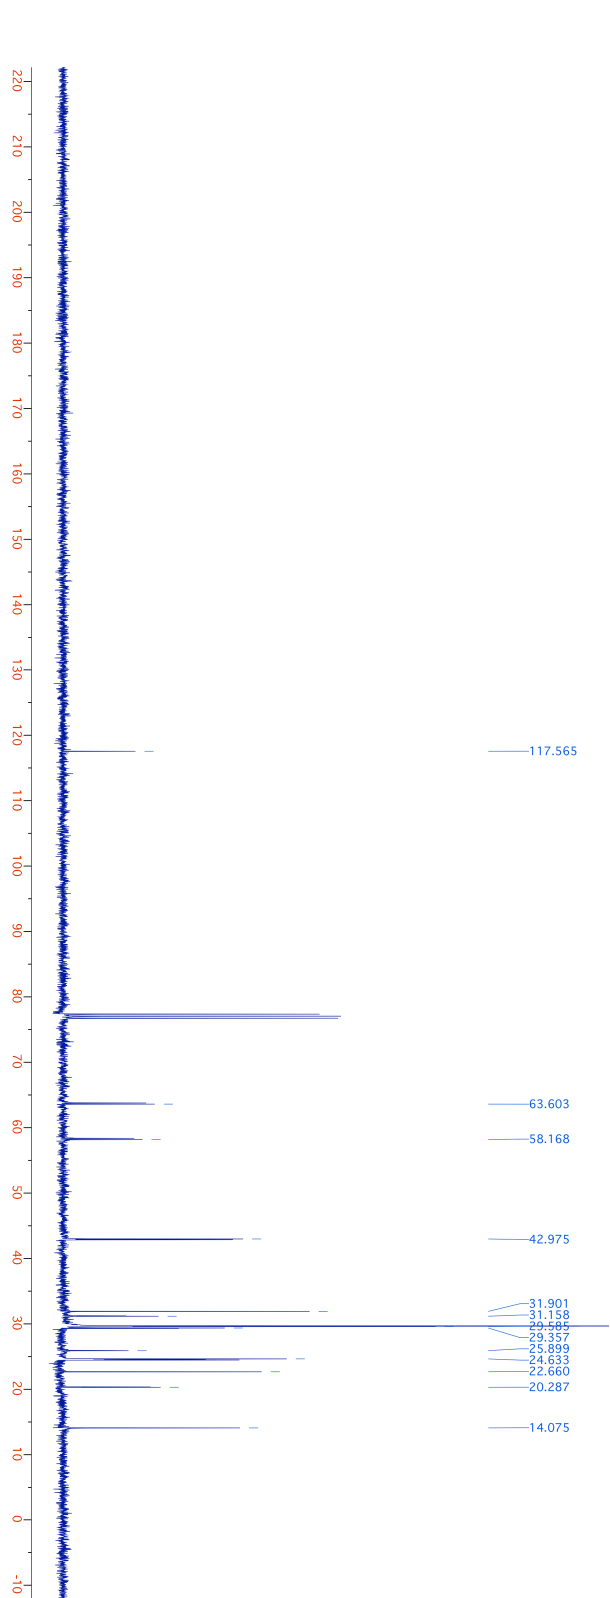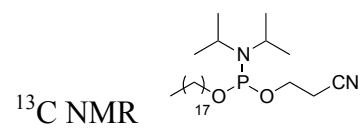

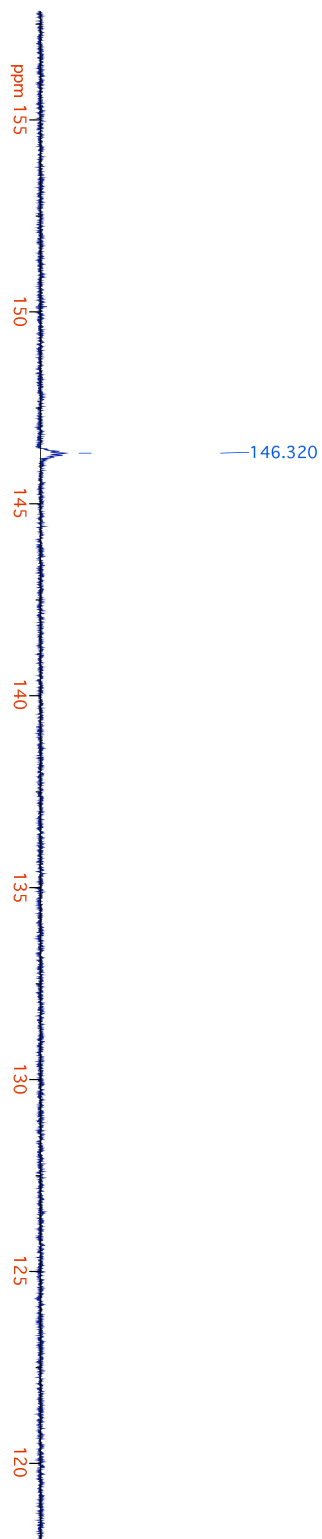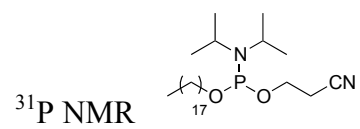

Supplement: NIHMS364432-supplement-1_si_001.pdf [file NIHMS364432-supplement-1_si_001.pdf]
